# Supplementary material
Source: Copernicus journal article supplement (doi:10.5194/bg-23-2641-2026)
Supplement: Supplementary file 1 [file bg-23-2641-2026-supplement.pdf]

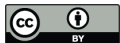

*Supplement of*

## **Potential of optical and ecological proxies to quantify phytoplankton carbon in oligotrophic waters**

**David Antoine et al.**

*Correspondence to:* Chandanlal Parida ([chandan.parida@curtin.edu.au](mailto:chandan.parida@curtin.edu.au))

The copyright of individual parts of the supplement might differ from the article licence.

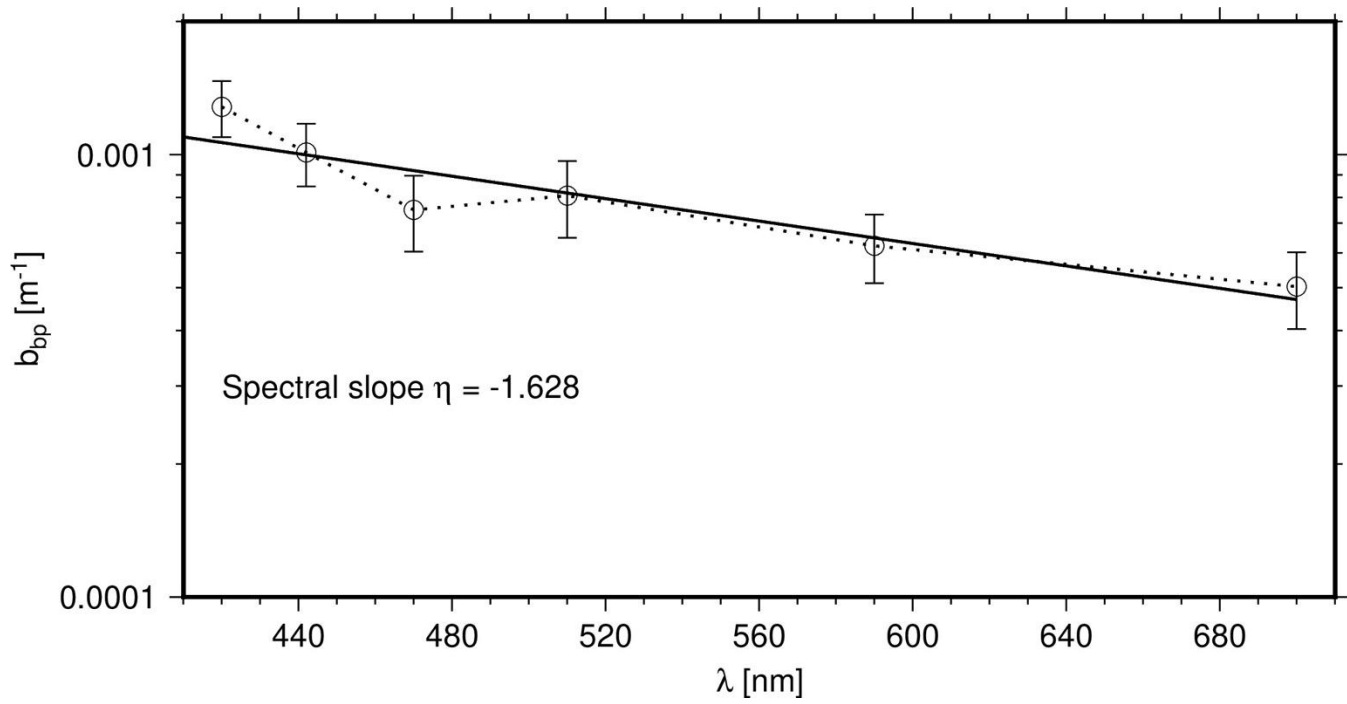

13 **Fig. S1.** Particulate backscattering coefficient at the 6 wavelengths of the Hydrosat-6 instrument. The  
14 open circles and vertical bars are average values and standard deviation for all data for depths < 150 m. The  
15 solid black line is the fit of the logarithm of  $b_{bp}$  against wavelength, with the slope reported on the panel.

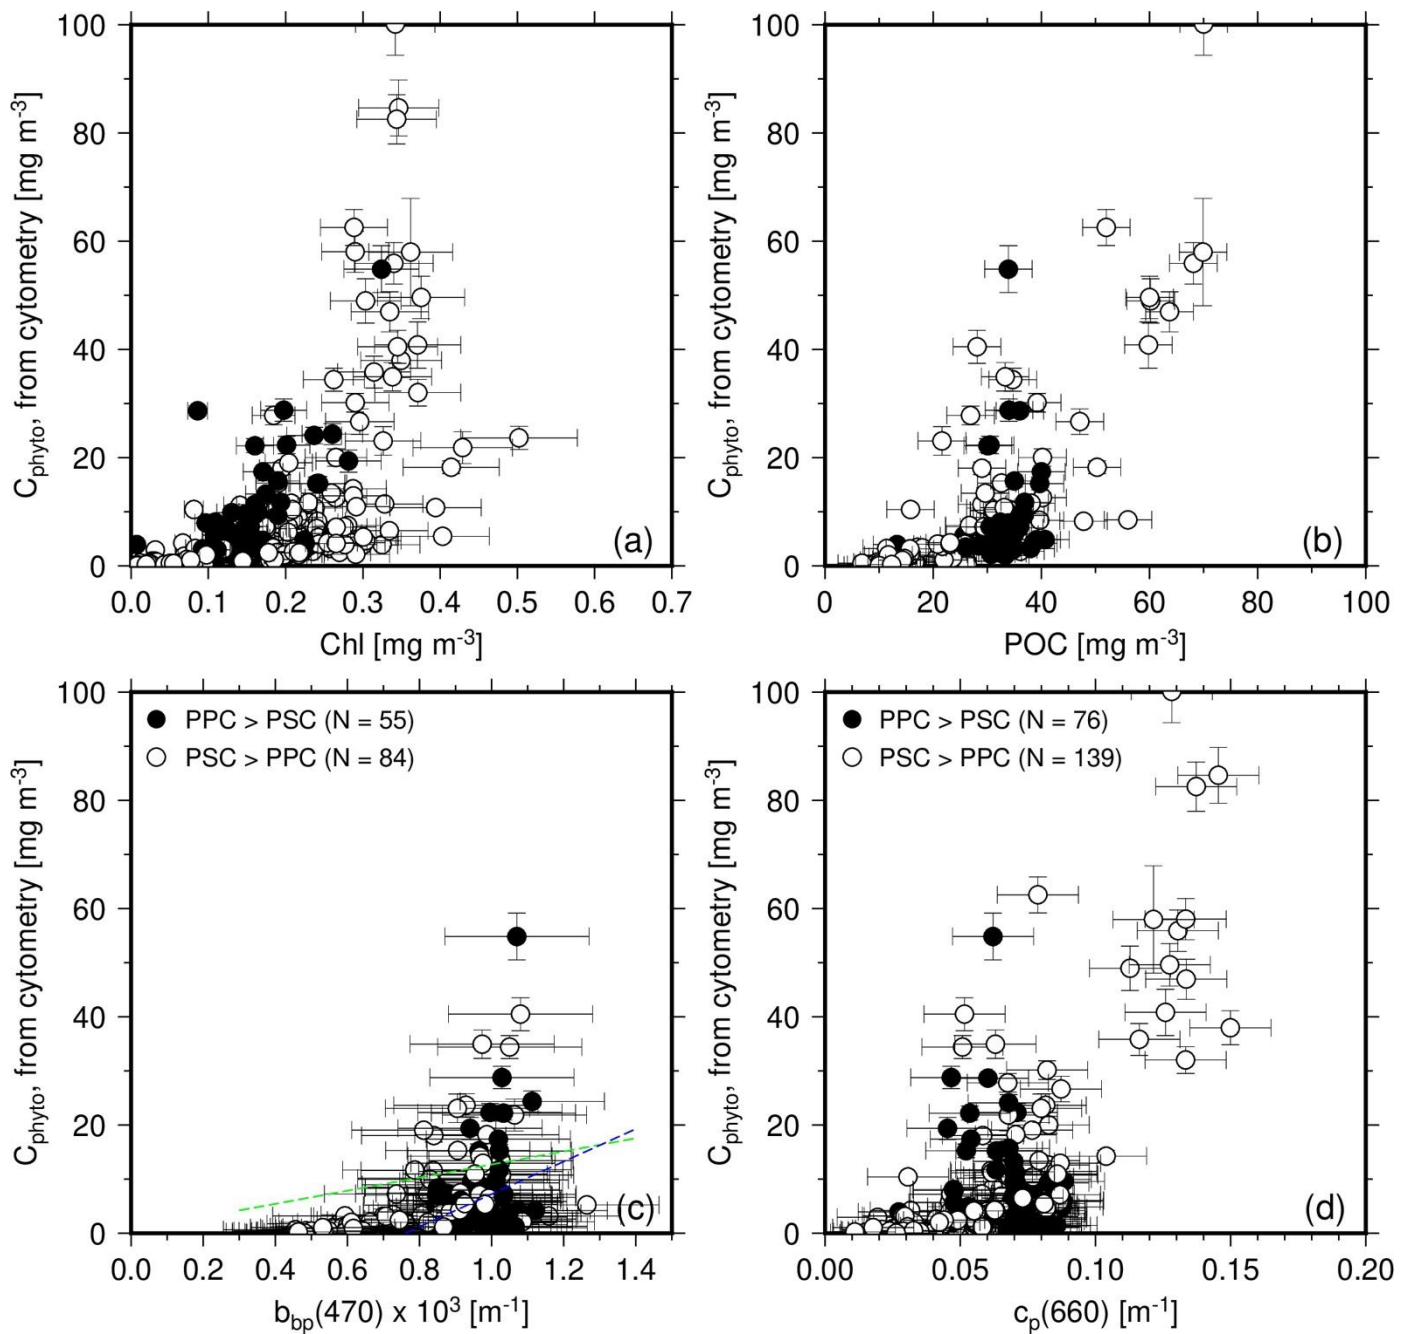

16 **Fig. S2.** The same data as plotted in Fig. 6b,d and Fig7b,d yet using here linear scales.
